# Supplementary material
Source: bioRxiv or medRxiv preprint supplement (https://www.medrxiv.org/highwire/filestream/97947/field_highwire_adjunct_files/5/2020.09.21.20196592-6.pdf)
Supplement: Supplementary file [file 2020.09.21.20196592-6.pdf]

## Multivariate regression

### TP53: adjustment for Age, Sex and BMI

| Synthèse de la Régression; Variable Dép. : MADRSTOT (Obespsy2019stats.sta) |                 |                  |                 |                 |                 |                 |
|----------------------------------------------------------------------------|-----------------|------------------|-----------------|-----------------|-----------------|-----------------|
| R= ,80746311 R²= ,65199668 R² Ajusté = ,60228191                           |                 |                  |                 |                 |                 |                 |
| F(4,28)=13,115 p<,00000 Err-Type de l'Estim.: 4,5905                       |                 |                  |                 |                 |                 |                 |
| N=33                                                                       | Bêta            | Err-Type de Bêta | B               | Err-Type de B   | t(28)           | niveau p        |
| <b>OrdOrig.</b>                                                            |                 |                  | 15,03103        | 9,464956        | 1,588071        | 0,123500        |
| AGE                                                                        | -0,060805       | 0,112653         | -0,03834        | 0,071035        | -0,539755       | 0,593633        |
| SEX                                                                        | 0,008784        | 0,113270         | 0,21902         | 2,824231        | 0,077549        | 0,938738        |
| IMC                                                                        | -0,039525       | 0,113212         | -0,05613        | 0,160760        | -0,349126       | 0,729607        |
| ChEA TP53M0                                                                | <b>0,807600</b> | <b>0,114238</b>  | <b>59,51306</b> | <b>8,418368</b> | <b>7,069429</b> | <b>0,000000</b> |

### NR3C1: adjustment for Age, Sex and BMI

| Synthèse de la Régression; Variable Dép. : MADRSTOT (Obespsy2019stats.sta) |                 |                  |                 |                 |                 |                 |
|----------------------------------------------------------------------------|-----------------|------------------|-----------------|-----------------|-----------------|-----------------|
| R= ,79994758 R²= ,63991613 R² Ajusté = ,58847557                           |                 |                  |                 |                 |                 |                 |
| F(4,28)=12,440 p<,00001 Err-Type de l'Estim.: 4,6695                       |                 |                  |                 |                 |                 |                 |
| N=33                                                                       | Bêta            | Err-Type de Bêta | B               | Err-Type de B   | t(28)           | niveau p        |
| <b>OrdOrig.</b>                                                            |                 |                  | 19,56816        | 9,554568        | 2,048042        | 0,050038        |
| AGE                                                                        | -0,113469       | 0,115858         | -0,07155        | 0,073056        | -0,979385       | 0,335777        |
| SEX                                                                        | -0,082737       | 0,114227         | -2,06294        | 2,848100        | -0,724320       | 0,474878        |
| IMC                                                                        | -0,039322       | 0,115187         | -0,05584        | 0,163564        | -0,341376       | 0,735369        |
| ChEA NR3C1 M0                                                              | <b>0,803898</b> | <b>0,116813</b>  | <b>59,59298</b> | <b>8,659359</b> | <b>6,881916</b> | <b>0,000000</b> |

### RELA: adjustment for Age, Sex and BMI

| Synthèse de la Régression; Variable Dép. : MADRSTOT (Obespsy2019stats) |                 |                  |                 |                 |                |                 |
|------------------------------------------------------------------------|-----------------|------------------|-----------------|-----------------|----------------|-----------------|
| R= ,79869932 R²= ,63792061 R² Ajusté = ,58619498                       |                 |                  |                 |                 |                |                 |
| F(4,28)=12,333 p<,00001 Err-Type de l'Estim.: 4,6825                   |                 |                  |                 |                 |                |                 |
| N=33                                                                   | Bêta            | Err-Type de Bêta | B               | Err-Type de B   | t(28)          | niveau p        |
| <b>OrdOrig.</b>                                                        |                 |                  | <b>21,28979</b> | <b>9,56420</b>  | <b>2,22599</b> | <b>0,034240</b> |
| AGE                                                                    | -0,122716       | 0,116457         | -0,07738        | 0,07343         | -1,05375       | 0,301006        |
| SEX                                                                    | -0,029401       | 0,114949         | -0,73308        | 2,86610         | -0,25578       | 0,799993        |
| IMC                                                                    | -0,081075       | 0,114806         | -0,11512        | 0,16302         | -0,70619       | 0,485907        |
| ChEA RELA M0                                                           | <b>0,801226</b> | <b>0,116939</b>  | <b>71,28411</b> | <b>10,40390</b> | <b>6,85167</b> | <b>0,000000</b> |
